# Supplementary material for: Prediction of Incident Heart Failure in CKD: The CRIC Study
Source: PubMed Central journal article supplement — Kidney Int Rep. 2022 Feb 2;7(4):708–19. doi: 10.1016/j.ekir.2022.01.1067 (PMC9039424; doi:10.1016/j.ekir.2022.01.1067), 2022-02-02
Supplement: mmc1.pdf [file mmc1.pdf]

## **ONLINE SUPPLEMENTARY MATERIALS**

**Title:** Prediction of incident heart failure in chronic kidney disease: the CRIC Study

**Authors:** Zelnick LR, Shlipak MG, Soliman EZ, et al.

**Supplemental Methods.** Measurement of cardiac biomarkers

**Supplemental Table 1.** Baseline characteristics of CRIC analytic population by subtype of heart failure

**Supplemental Table 2.** Discriminatory ability of models to predict incident heart failure by eGFR category

**Supplemental Table 3.** Reclassification statistics of models to predict incident heart failure

**Supplemental Table 4.** TRIPOD checklist

**Supplemental Figure 1.** CONSORT diagram of analytic population

**Supplemental Figure 2.** Incidence rates of heart failure by decile of predicted probability

## **Supplemental Methods.**

### *Cardiac biomarker measurements*

Two clinically available cardiac biomarkers, sampled from participants at study enrollment, were also considered as candidate predictors: NT-proBNP and hsTnT.(10, 11) Both biomarkers were measured in 2008 from EDTA plasma stored at -70°C using a chemiluminescent microparticle immunoassay ([www.roche-diagnostics.us](http://www.roche-diagnostics.us)) on the ElecSys 2010 at the University of Maryland. The range of values for NT-proBNP was from 5 to 35,000 pg/mL and the coefficient of variation (CV) was 9.3% at a level of 126 pg/mL and 5.5% at 5319 pg/mL. hsTnT was measured using the highly sensitive assay with a range of values from 3 to 10,000 pg/mL. The CV was 6.0% at a level of 26 pg/mL and 5.4% at 2140 pg/mL. The value at the 99<sup>th</sup> percentile cutoff from a healthy reference population was 13 pg/mL for hsTnT with a 10% CV. Any values still below the lower limit of blank were characterized as “undetectable” and set to half of the lower limit for analytic purposes.

**Supplemental Table 1. Baseline characteristics of CRIC analytic population by subtype of heart failure (N = 2147)**

|                                            | Participants not experiencing incident heart failure during follow-up (N = 1823) | Participants experiencing incident HFpEF during follow-up (N = 135) | Participants experiencing incident HFrEF during follow-up (N = 104) | Participants experiencing unclassified heart failure during follow-up (N = 85) |
|--------------------------------------------|----------------------------------------------------------------------------------|---------------------------------------------------------------------|---------------------------------------------------------------------|--------------------------------------------------------------------------------|
| Age (years)                                | 58.1 (11.1)                                                                      | 61.5 (9.6)                                                          | 61.9 (9.1)                                                          | 61.5 (9.5)                                                                     |
| Men                                        | 956 (52)                                                                         | 69 (51)                                                             | 63 (61)                                                             | 41 (48)                                                                        |
| Race/ethnicity                             |                                                                                  |                                                                     |                                                                     |                                                                                |
| White                                      | 959 (53)                                                                         | 54 (40)                                                             | 50 (48)                                                             | 35 (41)                                                                        |
| Black                                      | 766 (42)                                                                         | 72 (53)                                                             | 49 (47)                                                             | 45 (53)                                                                        |
| Other                                      | 98 (5)                                                                           | 9 (7)                                                               | 5 (5)                                                               | 5 (6)                                                                          |
| Diabetes                                   | 747 (41)                                                                         | 91 (67)                                                             | 68 (65)                                                             | 51 (60)                                                                        |
| History of coronary heart disease          | 285 (16)                                                                         | 37 (27)                                                             | 42 (40)                                                             | 25 (29)                                                                        |
| History of atrial fibrillation             | 241 (13)                                                                         | 36 (27)                                                             | 31 (30)                                                             | 21 (25)                                                                        |
| History of stroke                          | 160 (9)                                                                          | 24 (18)                                                             | 12 (12)                                                             | 15 (18)                                                                        |
| History of PVD                             | 96 (5)                                                                           | 16 (12)                                                             | 12 (12)                                                             | 8 (9)                                                                          |
| History of COPD                            | 68 (4)                                                                           | 8 (6)                                                               | 8 (8)                                                               | 4 (5)                                                                          |
| Antihypertensive medications               | 1624 (89)                                                                        | 135 (100)                                                           | 101 (97)                                                            | 84 (99)                                                                        |
| ACEi/ARB                                   | 1221 (67)                                                                        | 102 (76)                                                            | 76 (73)                                                             | 65 (76)                                                                        |
| Beta blockers                              | 790 (43)                                                                         | 87 (64)                                                             | 70 (67)                                                             | 49 (58)                                                                        |
| Calcium channel blockers                   | 696 (38)                                                                         | 78 (58)                                                             | 51 (49)                                                             | 52 (61)                                                                        |
| Diuretics                                  | 952 (52)                                                                         | 102 (76)                                                            | 75 (72)                                                             | 59 (69)                                                                        |
| Height (cm)                                | 169.0 (9.6)                                                                      | 166.8 (9.8)                                                         | 169.8 (9.1)                                                         | 167.8 (9.5)                                                                    |
| Weight (kg)                                | 88.6 (21.3)                                                                      | 92.8 (23.1)                                                         | 96.0 (24.3)                                                         | 93.9 (22.6)                                                                    |
| BMI (kg/m <sup>2</sup> )                   | 31.0 (7.2)                                                                       | 33.3 (7.9)                                                          | 33.2 (7.6)                                                          | 33.3 (7.7)                                                                     |
| Systolic blood pressure (mmHg)             | 124.4 (20.5)                                                                     | 136.1 (22.4)                                                        | 131.3 (22.0)                                                        | 133.6 (20.4)                                                                   |
| Diastolic blood pressure (mmHg)            | 70.3 (12.2)                                                                      | 67.9 (13.5)                                                         | 70.2 (14.3)                                                         | 68.3 (13.1)                                                                    |
| Heart rate (bpm)                           | 65.1 (11.4)                                                                      | 64.6 (11.5)                                                         | 67.6 (11.5)                                                         | 66.0 (10.8)                                                                    |
| eGFR (CKD-EPI), mL/min/1.73m <sup>2</sup>  | 45.0 (15.6)                                                                      | 36.4 (15.4)                                                         | 37.1 (12.9)                                                         | 37.9 (15.2)                                                                    |
| eGFR category (mL/min/1.73m <sup>2</sup> ) |                                                                                  |                                                                     |                                                                     |                                                                                |
| ≥ 60                                       | 311 (17)                                                                         | 9 (7)                                                               | 5 (5)                                                               | 7 (8)                                                                          |
| 45-59                                      | 569 (31)                                                                         | 25 (19)                                                             | 25 (24)                                                             | 18 (21)                                                                        |
| 30-44                                      | 593 (33)                                                                         | 50 (37)                                                             | 39 (38)                                                             | 31 (36)                                                                        |
| <30                                        | 322 (18)                                                                         | 44 (33)                                                             | 34 (33)                                                             | 26 (31)                                                                        |
| ESRD                                       | 16 (1)                                                                           | 4 (3)                                                               | 1 (1)                                                               | 0 (0)                                                                          |

|                                                       |              |               |               |              |
|-------------------------------------------------------|--------------|---------------|---------------|--------------|
| 24-hour urine albumin (mg), median (IQR)              | 32 (8-311)   | 253 (34-1060) | 134 (25-1073) | 163 (18-837) |
| Hemoglobin (g/dL)                                     | 13.0 (1.7)   | 12.1 (1.8)    | 12.3 (1.7)    | 12.5 (1.9)   |
| LDL (mg/dL)                                           | 101.2 (33.7) | 100.9 (37.7)  | 98.1 (34.6)   | 96.2 (38.5)  |
| HDL (mg/dL)                                           | 50.1 (16.2)  | 48.2 (15.1)   | 45.1 (15.4)   | 48.7 (13.3)  |
| LV mass index, Cornell criteria (g/m <sup>2.7</sup> ) | 48.5 (12.3)  | 57.1 (12.8)   | 58.2 (13.5)   | 58.5 (16.3)  |
| Left ventricular ejection fraction (%)                | 55.7 (6.9)   | 54.7 (6.1)    | 49.1 (10.8)   | 53.6 (8.2)   |

Entries are mean (SD) for continuous variables and N (%) for categorical variables, except as noted.

Abbreviations: HFpEF, preserved ejection fraction heart failure; HFrEF, reduced ejection fraction heart failure; COPD, chronic obstructive pulmonary disease; MI, myocardial infarction; PVD, peripheral vascular disease; eGFR, estimated glomerular filtration rate; BMI, body mass index; ECG, electrocardiogram; LDL, low-density lipoprotein; HDL, high-density lipoprotein; FGF, fibroblast growth factor; PTH, parathyroid hormone; ACEi, angiotensin-converting enzyme inhibitor; ARB, angiotensin receptor blocker

**Supplemental Table 2. Discriminatory ability of models to predict incident heart failure by eGFR category**

|                                                                         | N at risk<br>(N events) | C-index (95% CI)     | Difference in C-index<br>(95% CI), compared with<br>ARIC clinical model with<br>published coefficients | Difference in C-index<br>(95% CI), compared with<br>ARIC clinical model with<br>re-estimated coefficients |
|-------------------------------------------------------------------------|-------------------------|----------------------|--------------------------------------------------------------------------------------------------------|-----------------------------------------------------------------------------------------------------------|
| <b>eGFR &lt;30 mL/min/1.73m<sup>2</sup> or ESRD</b>                     | 447 (109)               |                      |                                                                                                        |                                                                                                           |
| ARIC clinical model (published coefficients)                            |                         | 0.654 (0.605, 0.704) | Reference                                                                                              | NA                                                                                                        |
| ARIC + NT-proBNP                                                        |                         | 0.686 (0.640, 0.732) | <b>0.032 (0.002, 0.062)</b>                                                                            | NA                                                                                                        |
| NT-proBNP alone                                                         |                         | 0.642 (0.591, 0.692) | -0.013 (-0.082, 0.056)                                                                                 | -0.039 (-0.109, 0.031)                                                                                    |
| hsTnT alone                                                             |                         | 0.578 (0.525, 0.632) | <b>-0.076 (-0.139, -0.013)</b>                                                                         | -0.102 (-0.166, -0.039)                                                                                   |
| NT-proBNP + hsTnT                                                       |                         | 0.634 (0.583, 0.685) | -0.020 (-0.085, 0.044)                                                                                 | -0.046 (-0.112, 0.019)                                                                                    |
| LV mass + LV ejection fraction                                          |                         | 0.653 (0.602, 0.705) | -0.001 (-0.062, 0.060)                                                                                 | -0.027 (-0.087, 0.032)                                                                                    |
| Clinical variables only (re-estimated coefficients)                     |                         | 0.681 (0.631, 0.730) | 0.026 (-0.008, 0.060)                                                                                  | Reference                                                                                                 |
| Clinical variables + NT-proBNP                                          |                         | 0.706 (0.660, 0.752) | <b>0.052 (0.007, 0.097)</b>                                                                            | 0.025 (-0.008, 0.059)                                                                                     |
| Clinical variables + hsTnT                                              |                         | 0.674 (0.624, 0.724) | 0.020 (-0.021, 0.061)                                                                                  | -0.006 (-0.035, 0.022)                                                                                    |
| Clinical variables + NT-proBNP + hsTnT                                  |                         | 0.697 (0.649, 0.745) | 0.043 (-0.003, 0.089)                                                                                  | 0.017 (-0.020, 0.053)                                                                                     |
| Clinical variables + LV mass + LV ejection fraction                     |                         | 0.701 (0.654, 0.749) | <b>0.047 (0.004, 0.090)</b>                                                                            | 0.021 (-0.009, 0.051)                                                                                     |
| Clinical variables + NT-proBNP + hsTnT + LV mass + LV ejection fraction |                         | 0.707 (0.660, 0.755) | <b>0.053 (0.005, 0.101)</b>                                                                            | 0.027 (-0.012, 0.066)                                                                                     |
| <b>eGFR 30-&lt;45 mL/min/1.73m<sup>2</sup></b>                          | 713 (120)               |                      |                                                                                                        |                                                                                                           |
| ARIC clinical model (published coefficients)                            |                         | 0.626 (0.576, 0.676) | Reference                                                                                              | NA                                                                                                        |
| ARIC + NT-proBNP                                                        |                         | 0.706 (0.659, 0.752) | <b>0.080 (0.053, 0.106)</b>                                                                            | NA                                                                                                        |
| NT-proBNP alone                                                         |                         | 0.686 (0.639, 0.732) | <b>0.060 (0.001, 0.119)</b>                                                                            | 0.042 (-0.016, 0.100)                                                                                     |
| hsTnT alone                                                             |                         | 0.670 (0.623, 0.717) | 0.044 (-0.017, 0.105)                                                                                  | 0.026 (-0.031, 0.083)                                                                                     |
| NT-proBNP + hsTnT                                                       |                         | 0.722 (0.674, 0.769) | <b>0.096 (0.038, 0.154)</b>                                                                            | <b>0.078 (0.022, 0.134)</b>                                                                               |
| LV mass + LV ejection fraction                                          |                         | 0.697 (0.650, 0.745) | <b>0.071 (0.013, 0.130)</b>                                                                            | 0.054 (-0.001, 0.108)                                                                                     |
| Clinical variables only (re-estimated coefficients)                     |                         | 0.644 (0.596, 0.691) | 0.018 (-0.019, 0.055)                                                                                  | Reference                                                                                                 |
| Clinical variables + NT-proBNP                                          |                         | 0.713 (0.667, 0.760) | <b>0.087 (0.041, 0.134)</b>                                                                            | <b>0.070 (0.036, 0.103)</b>                                                                               |
| Clinical variables + hsTnT                                              |                         | 0.680 (0.634, 0.727) | <b>0.054 (0.009, 0.100)</b>                                                                            | <b>0.036 (0.008, 0.065)</b>                                                                               |
| Clinical variables + NT-proBNP + hsTnT                                  |                         | 0.721 (0.674, 0.767) | <b>0.095 (0.046, 0.143)</b>                                                                            | <b>0.077 (0.040, 0.113)</b>                                                                               |
| Clinical variables + LV mass + LV ejection fraction                     |                         | 0.702 (0.655, 0.749) | <b>0.076 (0.029, 0.122)</b>                                                                            | <b>0.058 (0.025, 0.091)</b>                                                                               |
| Clinical variables + NT-proBNP + hsTnT + LV mass + LV ejection fraction |                         | 0.739 (0.693, 0.785) | <b>0.113 (0.064, 0.162)</b>                                                                            | <b>0.095 (0.057, 0.134)</b>                                                                               |

|                                                                         | N at risk<br>(N events) | C-index (95% CI)     | Difference in C-index<br>(95% CI), compared with<br>ARIC clinical model with<br>published coefficients | Difference in C-index<br>(95% CI), compared with<br>ARIC clinical model with<br>re-estimated coefficients |
|-------------------------------------------------------------------------|-------------------------|----------------------|--------------------------------------------------------------------------------------------------------|-----------------------------------------------------------------------------------------------------------|
| <b>eGFR 45-&lt;60 mL/min/1.73m<sup>2</sup></b>                          | 637 (68)                |                      |                                                                                                        |                                                                                                           |
| ARIC clinical model (published coefficients)                            |                         | 0.686 (0.618, 0.753) | Reference                                                                                              | NA                                                                                                        |
| ARIC + NT-proBNP                                                        |                         | 0.720 (0.658, 0.783) | 0.035 (-0.007, 0.076)                                                                                  | NA                                                                                                        |
| NT-proBNP alone                                                         |                         | 0.661 (0.594, 0.728) | -0.025 (-0.114, 0.064)                                                                                 | -0.025 (-0.112, 0.061)                                                                                    |
| hsTnT alone                                                             |                         | 0.624 (0.556, 0.693) | -0.061 (-0.132, 0.009)                                                                                 | -0.062 (-0.131, 0.008)                                                                                    |
| NT-proBNP + hsTnT                                                       |                         | 0.681 (0.613, 0.748) | -0.005 (-0.082, 0.073)                                                                                 | -0.005 (-0.081, 0.071)                                                                                    |
| LV mass + LV ejection fraction                                          |                         | 0.687 (0.625, 0.748) | 0.001 (-0.075, 0.077)                                                                                  | 0.001 (-0.072, 0.074)                                                                                     |
| Clinical variables only (re-estimated coefficients)                     |                         | 0.686 (0.622, 0.751) | 0.000 (-0.039, 0.040)                                                                                  | Reference                                                                                                 |
| Clinical variables + NT-proBNP                                          |                         | 0.719 (0.658, 0.780) | 0.034 (-0.024, 0.091)                                                                                  | 0.033 (-0.012, 0.079)                                                                                     |
| Clinical variables + hsTnT                                              |                         | 0.693 (0.627, 0.758) | 0.007 (-0.037, 0.051)                                                                                  | 0.007 (-0.018, 0.032)                                                                                     |
| Clinical variables + NT-proBNP + hsTnT                                  |                         | 0.718 (0.656, 0.780) | 0.032 (-0.025, 0.089)                                                                                  | 0.032 (-0.013, 0.077)                                                                                     |
| Clinical variables + LV mass + LV ejection fraction                     |                         | 0.728 (0.669, 0.787) | 0.042 (-0.006, 0.091)                                                                                  | <b>0.042 (0.007, 0.077)</b>                                                                               |
| Clinical variables + NT-proBNP + hsTnT + LV mass + LV ejection fraction |                         | 0.738 (0.678, 0.799) | 0.053 (-0.005, 0.111)                                                                                  | <b>0.052 (0.004, 0.100)</b>                                                                               |
| <b>eGFR ≥60 mL/min/1.73m<sup>2</sup></b>                                | 332 (21)                |                      |                                                                                                        |                                                                                                           |
| ARIC clinical model (published coefficients)                            |                         | 0.789 (0.689, 0.888) | Reference                                                                                              | NA                                                                                                        |
| ARIC + NT-proBNP                                                        |                         | 0.791 (0.692, 0.891) | 0.003 (-0.067, 0.072)                                                                                  | NA                                                                                                        |
| NT-proBNP alone                                                         |                         | 0.629 (0.486, 0.773) | -0.159 (-0.320, 0.002)                                                                                 | <b>-0.208 (-0.356, -0.060)</b>                                                                            |
| hsTnT alone                                                             |                         | 0.782 (0.677, 0.887) | -0.007 (-0.134, 0.120)                                                                                 | -0.055 (-0.158, 0.048)                                                                                    |
| NT-proBNP + hsTnT                                                       |                         | 0.726 (0.591, 0.861) | -0.063 (-0.212, 0.087)                                                                                 | -0.111 (-0.244, 0.022)                                                                                    |
| LV mass + LV ejection fraction                                          |                         | 0.729 (0.619, 0.840) | -0.059 (-0.206, 0.087)                                                                                 | -0.108 (-0.227, 0.012)                                                                                    |
| Clinical variables only (re-estimated coefficients)                     |                         | 0.837 (0.764, 0.910) | 0.048 (-0.014, 0.111)                                                                                  | Reference                                                                                                 |
| Clinical variables + NT-proBNP                                          |                         | 0.806 (0.717, 0.896) | 0.018 (-0.080, 0.115)                                                                                  | -0.031 (-0.101, 0.039)                                                                                    |
| Clinical variables + hsTnT                                              |                         | 0.856 (0.784, 0.929) | 0.068 (-0.011, 0.146)                                                                                  | 0.019 (-0.020, 0.058)                                                                                     |
| Clinical variables + NT-proBNP + hsTnT                                  |                         | 0.825 (0.737, 0.913) | 0.036 (-0.063, 0.135)                                                                                  | -0.012 (-0.083, 0.059)                                                                                    |
| Clinical variables + LV mass + LV ejection fraction                     |                         | 0.848 (0.775, 0.921) | 0.059 (-0.039, 0.158)                                                                                  | 0.011 (-0.051, 0.073)                                                                                     |
| Clinical variables + NT-proBNP + hsTnT + LV mass + LV ejection fraction |                         | 0.821 (0.731, 0.912) | 0.032 (-0.076, 0.141)                                                                                  | -0.016 (-0.097, 0.065)                                                                                    |

Clinical variables include age, black race/ethnicity, sex, heart rate, systolic blood pressure, antihypertensives, diabetes, coronary heart disease, current smoking, former smoking, and BMI. Entries for ARIC clinical and ARIC + NT-proBNP models are C-index and associated 95% bootstrap confidence intervals; all other entries are 10-fold cross-validated C-indices or difference in C-indices compared with ARIC clinical model, and associated 95% bootstrap confidence intervals. Bolded entries indicate statistical significance at the 5% level.

**Supplemental Table 3. Reclassification statistics of models to predict incident heart failure**

|                                                                         | <b>Continuous NRI<br/>(95% CI)</b> | <b>NRI (&lt;5%, 5%-10%, &gt;10% risk)<br/>(95% CI)</b> | <b>IDI<br/>(95% CI)</b>    |
|-------------------------------------------------------------------------|------------------------------------|--------------------------------------------------------|----------------------------|
| Clinical variables only (re-estimated)                                  | NA                                 | NA                                                     | NA                         |
| NT-proBNP alone                                                         | -9.2 (-29.6, 11.2)                 | -3.1 (-15.6, 9.5)                                      | -6.8 (-25.6, 11.9)         |
| hsTnT alone                                                             | -19.3 (-39.9, 1.3)                 | -6.8 (-20.7, 7)                                        | <b>-17.8 (-34.7, -1.0)</b> |
| NT-proBNP + hsTnT                                                       | 3.0 (-19.4, 25.4)                  | 7.5 (-3.9, 19.0)                                       | 7.2 (-12.7, 27.2)          |
| LV mass + LV ejection fraction                                          | -17.5 (-35.1, 0.1)                 | -9.1 (-21.9, 3.6)                                      | <b>-18.7 (-33.2, -4.2)</b> |
| Clinical variables + NT-proBNP                                          | <b>47.8 (35.5, 60.1)</b>           | <b>14.0 (6.4, 21.5)</b>                                | <b>35.7 (23.4, 48.0)</b>   |
| Clinical variables + hsTnT                                              | <b>36.7 (22.2, 51.2)</b>           | <b>7.3 (0.8, 13.7)</b>                                 | <b>21.2 (9.2, 33.1)</b>    |
| Clinical variables + NT-proBNP + hsTnT                                  | <b>53.2 (40.2, 66.2)</b>           | <b>15.3 (7.4, 23.3)</b>                                | <b>41.1 (27.8, 54.4)</b>   |
| Clinical variables + LV mass + LV ejection fraction                     | <b>38.1 (24.5, 51.6)</b>           | <b>11.9 (5.1, 18.7)</b>                                | <b>23.6 (14.8, 32.4)</b>   |
| Clinical variables + NT-proBNP + hsTnT + LV mass + LV ejection fraction | <b>58.3 (45.4, 71.2)</b>           | <b>18.9 (10.5, 27.2)</b>                               | <b>47.9 (35.2, 60.7)</b>   |

NRI, net reclassification improvement; IDI, integrated discrimination improvement. Reclassification statistics are relative to a model that included ARIC clinical variables (age, black race/ethnicity, sex, heart rate, systolic blood pressure, antihypertensives, diabetes, coronary heart disease, current smoking, former smoking, and BMI) but with coefficients that were re-estimated in the CRIC cohort. Categorical NRI is calculated for 10-year risk categories of <5%, 5%-10%, and >10% and is supplemented by the continuous NRI and IDI index.



## Supplemental Table 4. TRIPOD checklist

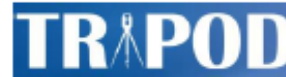

### TRIPOD Checklist: Prediction Model Development and Validation

| Section/Topic                | Item | Checklist Item                                                                                                                                                                                            | Page                       |
|------------------------------|------|-----------------------------------------------------------------------------------------------------------------------------------------------------------------------------------------------------------|----------------------------|
| <b>Title and abstract</b>    |      |                                                                                                                                                                                                           |                            |
| Title                        | 1    | D;V Identify the study as developing and/or validating a multivariable prediction model, the target population, and the outcome to be predicted.                                                          | 1                          |
| Abstract                     | 2    | D;V Provide a summary of objectives, study design, setting, participants, sample size, predictors, outcome, statistical analysis, results, and conclusions.                                               | 3                          |
| <b>Introduction</b>          |      |                                                                                                                                                                                                           |                            |
| Background and objectives    | 3a   | D;V Explain the medical context (including whether diagnostic or prognostic) and rationale for developing or validating the multivariable prediction model, including references to existing models.      | 5                          |
|                              | 3b   | D;V Specify the objectives, including whether the study describes the development or validation of the model or both.                                                                                     | 5                          |
| <b>Methods</b>               |      |                                                                                                                                                                                                           |                            |
| Source of data               | 4a   | D;V Describe the study design or source of data (e.g., randomized trial, cohort, or registry data), separately for the development and validation data sets, if applicable.                               | 6                          |
|                              | 4b   | D;V Specify the key study dates, including start of accrual; end of accrual; and, if applicable, end of follow-up.                                                                                        | 6                          |
| Participants                 | 5a   | D;V Specify key elements of the study setting (e.g., primary care, secondary care, general population) including number and location of centres.                                                          | 6                          |
|                              | 5b   | D;V Describe eligibility criteria for participants.                                                                                                                                                       | 6                          |
|                              | 5c   | D;V Give details of treatments received, if relevant.                                                                                                                                                     |                            |
| Outcome                      | 6a   | D;V Clearly define the outcome that is predicted by the prediction model, including how and when assessed.                                                                                                | 9-10                       |
|                              | 6b   | D;V Report any actions to blind assessment of the outcome to be predicted.                                                                                                                                |                            |
| Predictors                   | 7a   | D;V Clearly define all predictors used in developing or validating the multivariable prediction model, including how and when they were measured.                                                         | 7-9                        |
|                              | 7b   | D;V Report any actions to blind assessment of predictors for the outcome and other predictors.                                                                                                            |                            |
| Sample size                  | 8    | D;V Explain how the study size was arrived at.                                                                                                                                                            | 7                          |
| Missing data                 | 9    | D;V Describe how missing data were handled (e.g., complete-case analysis, single imputation, multiple imputation) with details of any imputation method.                                                  | 11                         |
| Statistical analysis methods | 10a  | D Describe how predictors were handled in the analyses.                                                                                                                                                   | 11                         |
|                              | 10b  | D Specify type of model, all model-building procedures (including any predictor selection), and method for internal validation.                                                                           | 10-12                      |
|                              | 10c  | V For validation, describe how the predictions were calculated.                                                                                                                                           | 11                         |
|                              | 10d  | D;V Specify all measures used to assess model performance and, if relevant, to compare multiple models.                                                                                                   | 12                         |
|                              | 10e  | V Describe any model updating (e.g., recalibration) arising from the validation, if done.                                                                                                                 | 11                         |
| Risk groups                  | 11   | D;V Provide details on how risk groups were created, if done.                                                                                                                                             | 11-12                      |
| Development vs. validation   | 12   | V For validation, identify any differences from the development data in setting, eligibility criteria, outcome, and predictors.                                                                           |                            |
| <b>Results</b>               |      |                                                                                                                                                                                                           |                            |
| Participants                 | 13a  | D;V Describe the flow of participants through the study, including the number of participants with and without the outcome and, if applicable, a summary of the follow-up time. A diagram may be helpful. | 13, supplementary figure 1 |
|                              | 13b  | D;V Describe the characteristics of the participants (basic demographics, clinical features, available predictors), including the number of participants with missing data for predictors and outcome.    | 13                         |
|                              | 13c  | V For validation, show a comparison with the development data of the distribution of important variables (demographics, predictors and outcome).                                                          |                            |
| Model development            | 14a  | D Specify the number of participants and outcome events in each analysis.                                                                                                                                 | 13                         |
|                              | 14b  | D If done, report the unadjusted association between each candidate predictor and outcome.                                                                                                                |                            |
| Model specification          | 15a  | D Present the full prediction model to allow predictions for individuals (i.e., all regression coefficients, and model intercept or baseline survival at a given time point).                             | 30                         |
|                              | 15b  | D Explain how to use the prediction model.                                                                                                                                                                | 30                         |
| Model performance            | 16   | D;V Report performance measures (with CIs) for the prediction model.                                                                                                                                      | 29                         |
| Model-updating               | 17   | V If done, report the results from any model updating (i.e., model specification, model performance).                                                                                                     |                            |
| <b>Discussion</b>            |      |                                                                                                                                                                                                           |                            |
| Limitations                  | 18   | D;V Discuss any limitations of the study (such as nonrepresentative sample, few events per predictor, missing data).                                                                                      | 19                         |
| Interpretation               | 19a  | V For validation, discuss the results with reference to performance in the development data, and any other validation data.                                                                               |                            |
|                              | 19b  | D;V Give an overall interpretation of the results, considering objectives, limitations, results from similar studies, and other relevant evidence.                                                        | 15-19                      |
| Implications                 | 20   | D;V Discuss the potential clinical use of the model and implications for future research.                                                                                                                 | 18, 20                     |
| <b>Other information</b>     |      |                                                                                                                                                                                                           |                            |
| Supplementary information    | 21   | D;V Provide information about the availability of supplementary resources, such as study protocol, Web calculator, and data sets.                                                                         | 22                         |
| Funding                      | 22   | D;V Give the source of funding and the role of the funders for the present study.                                                                                                                         | 21                         |

**Supplemental Figure 1. CONSORT diagram of analytic population**

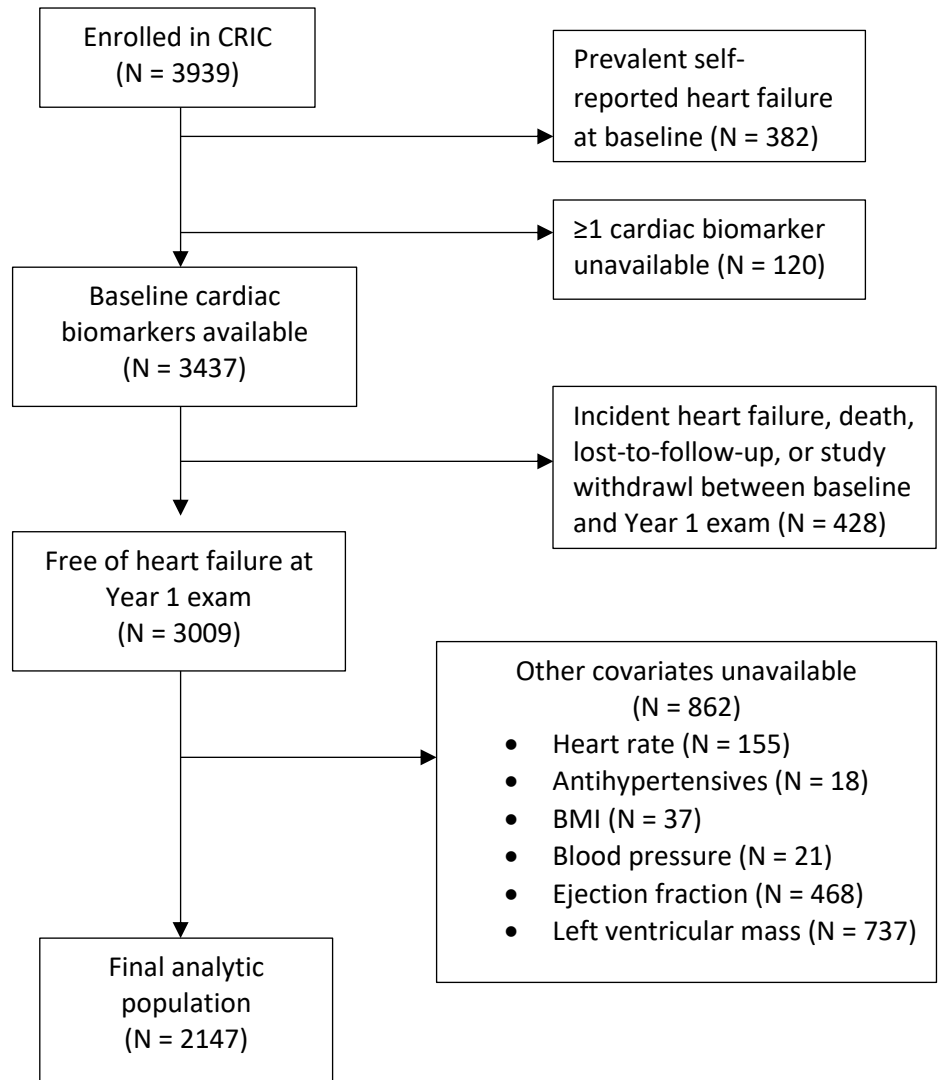

**Supplemental Figure 2. Incidence rates of heart failure by decile of predicted probability**

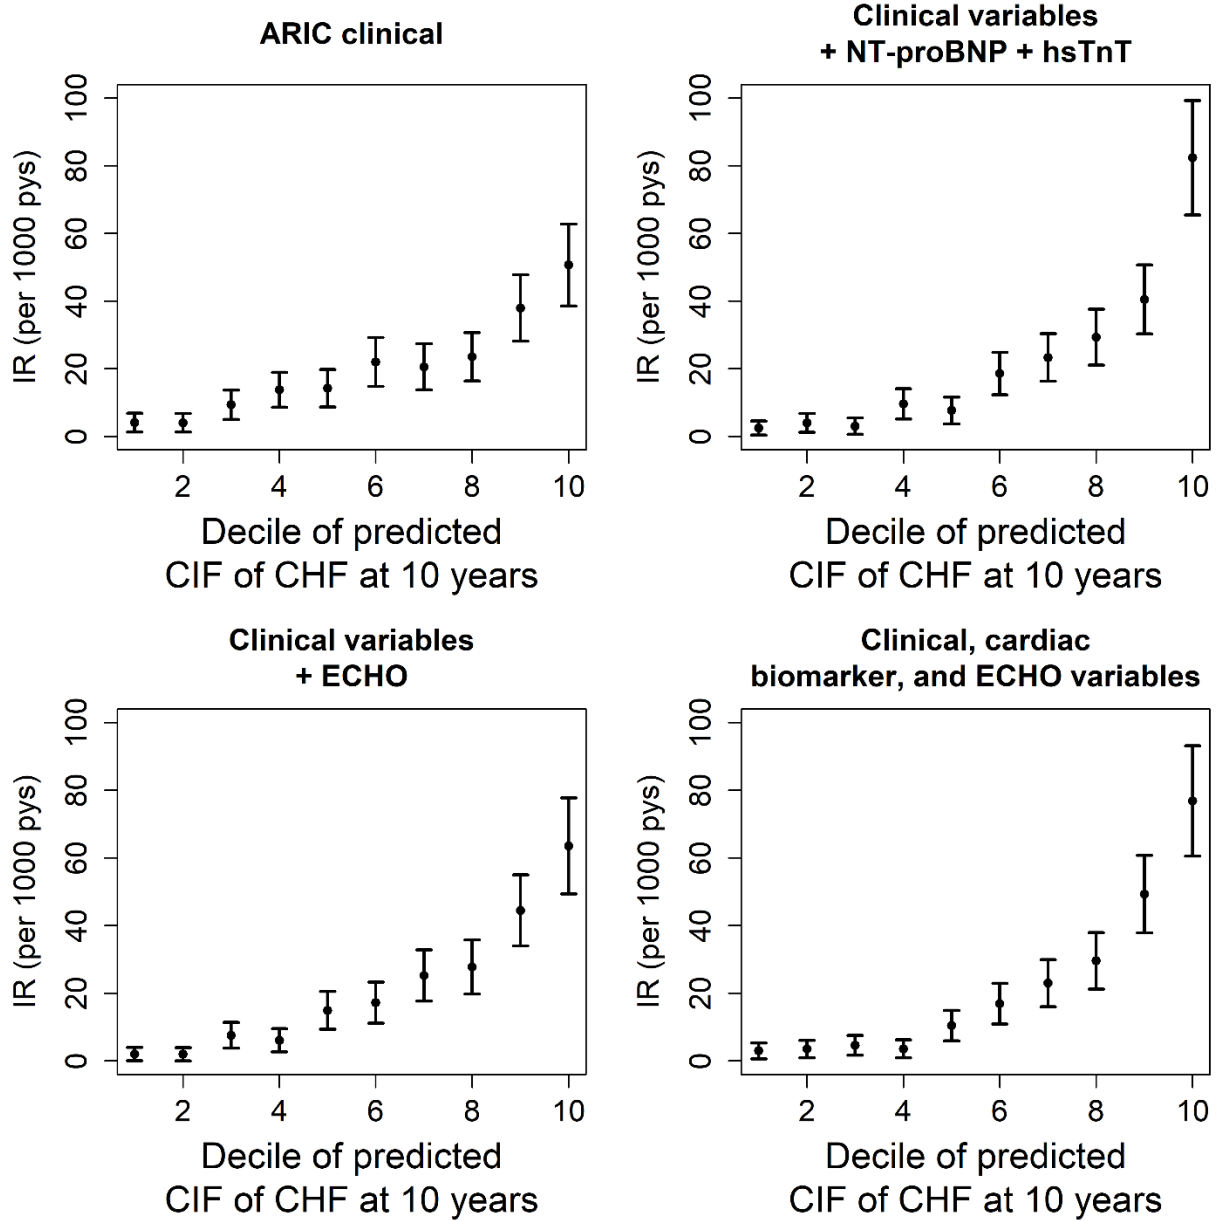

Figures show incidence rates and associated 95% bootstrapped confidence intervals, per 1000 person-years, by decile of predicted probability.
